# Supplementary material for: Tourniquet use in total knee replacement surgery: a feasibility study and pilot randomised controlled trial (SAFE-TKR study)
Source: HighWire-hosted journal article supplement (doi:10.1136/bmjopen-2020-043564), 2021-01-01
Supplement: bmjopen-2020-043564supp001_data_supplement.pdf [file bmjopen-2020-043564supp001_data_supplement.pdf]

**Supplementary file 1: Oxford Cognitive screen results.**

## Oxford Cognitive Screen Results

OCS scores within each cognitive domain are shown in supplementary table 1, there is no total summary score for this measure. However, across the five cognitive domains at baseline more participants had normal scores in the group allocated to tourniquet inflated versus tourniquet not inflated. Data was missing for six participants in the group allocated to tourniquet, four of these participants felt too unwell to complete the test, for one participant research staff were not available to administer it and for one participant the reason was not recorded. In comparison at day one data was missing for one participant in the group allocated to tourniquet not inflated, the reason for this missing data was not recorded. At day one in both groups there was a deterioration in the proportion of normal cognitive scores across all five domain, this improved at day two but not returned to baseline levels at one week.

Supplementary table 1: OCS Scores

| Item                                                                                                 | Baseline (n,%) |                | Day 1 (n,%) |                | Day 2 (n,%) |                | Week 1 (n,%) |                |
|------------------------------------------------------------------------------------------------------|----------------|----------------|-------------|----------------|-------------|----------------|--------------|----------------|
|                                                                                                      | T inflated     | T not inflated | T inflated  | T not inflated | T inflated  | T not inflated | T inflated   | T not inflated |
| Number randomised to group                                                                           | 27             | 26             | 27          | 26             | 27          | 26             | 27           | 26             |
| Scores present (n, %t)                                                                               | 27 (100)       | 25 (96)        | 21 (78)     | 25 (96)        | 24 (89)     | 24 (92)        | 22 (81)      | 22 (85)        |
| Numbers are of patients who record normal (not impaired) scores, percentages are of randomised group |                |                |             |                |             |                |              |                |
| <b>1. Attention &amp; executive function</b>                                                         |                |                |             |                |             |                |              |                |
| Accuracy                                                                                             | 26 (96)        | 22 (85)        | 19 (70)     | 17 (65)        | 21 (78)     | 22 (85)        | 20 (74)      | 19 (73)        |
| Space neglect                                                                                        | 24 (89)        | 22 (85)        | 15 (56)     | 19 (73)        | 21 (78)     | 22 (85)        | 19 (70)      | 17 (65)        |
| Object neglect                                                                                       | 25 (93)        | 21 (81)        | 20 (74)     | 24 (92)        | 23 (85)     | 23 (88)        | 20 (74)      | 20 (77)        |
| Perseveration                                                                                        | 26 (96)        | 23 (88)        | 21 (78)     | 25 (96)        | 23 (85)     | 23 (88)        | 21 (78)      | 20 (77)        |
| Single rule                                                                                          | 24 (89)        | 23 (88)        | 20 (74)     | 23 (88)        | 22 (81)     | 21 (81)        | 21 (78)      | 22 (85)        |
| Alternating rule                                                                                     | 25 (93)        | 20 (77)        | 18 (67)     | 21 (81)        | 20 (74)     | 20 (77)        | 20 (74)      | 21 (81)        |
| Heart Organisation Index                                                                             | 27 (100)       | 22 (85)        | 19 (70)     | 23 (88)        | 20 (74)     | 21 (81)        | 20 (74)      | 19 (73)        |
| <b>2. Language</b>                                                                                   |                |                |             |                |             |                |              |                |
| Picture naming                                                                                       | 26 (96)        | 25 (96)        | 21 (78)     | 24 (92)        | 23 (85)     | 23 (88)        | 21 (78)      | 22 (85)        |
| Semantics                                                                                            | 26 (96)        | 25 (96)        | 21 (78)     | 25 (96)        | 24 (89)     | 24 (92)        | 22 (81)      | 22 (85)        |
| Sentence reading                                                                                     | 24 (89)        | 22 (85)        | 14 (52)     | 20 (77)        | 19 (70)     | 20 (77)        | 21 (78)      | 19 (73)        |
| <b>3. Memory</b>                                                                                     |                |                |             |                |             |                |              |                |
| Overall verbal memory                                                                                | 26 (96)        | 24 (92)        | 21 (78)     | 23 (88)        | 24 (89)     | 24 (92)        | 22 (81)      | 22 (85)        |
| Episodic Memory                                                                                      | 27 (100)       | 24 (92)        | 20 (74)     | 22 (85)        | 22 (81)     | 24 (92)        | 21 (78)      | 22 (85)        |
| Orientation                                                                                          | 8 (30)         | 8 (31)         | 4 (15)      | 7 (27)         | 8 (30)      | 8 (31)         | 7 (26)       | 8 (31)         |
| <b>4. Number processing</b>                                                                          |                |                |             |                |             |                |              |                |
| Numerical calculation                                                                                | 24 (89)        | 21 (81)        | 20 (74)     | 24 (92)        | 21 (78)     | 24 (92)        | 19 (70)      | 22 (85)        |
| Number writing                                                                                       | 24 (89)        | 20 (77)        | 18 (67)     | 20 (77)        | 19 (70)     | 21 (81)        | 17 (63)      | 20 (77)        |

| <b>5. Praxis</b>                    |         |         |         |         |         |         |         |         |
|-------------------------------------|---------|---------|---------|---------|---------|---------|---------|---------|
| Overall                             | 22 (81) | 16 (62) | 16 (59) | 17 (65) | 22 (81) | 18 (69) | 12 (44) | 15 (58) |
| <b>6. Visual fields</b>             |         |         |         |         |         |         |         |         |
| Visual Perception:<br>Total correct | 22 (81) | 24 (92) | 14 (52) | 18 (69) | 18 (67) | 23 (88) | 16 (59) | 22 (85) |
| Visual field                        | 20 (74) | 23 (88) | 15 (56) | 19 (73) | 18 (67) | 22 (85) | 19 (70) | 22 (85) |
| Visual Extinction:<br>Left          | 26 (96) | 23 (88) | 20 (74) | 22 (85) | 22 (81) | 24 (92) | 20 (74) | 22 (85) |
| Visual Extinction:<br>Right         | 25 (93) | 24 (92) | 19 (70) | 22 (85) | 23 (85) | 23 (88) | 20 (74) | 22 (85) |
